# Supplementary material
Source: MDPI journal article supplement (https://www.mdpi.com/2077-1312/8/7/528)
Supplement: s1 [file s1]

## Supplementary files

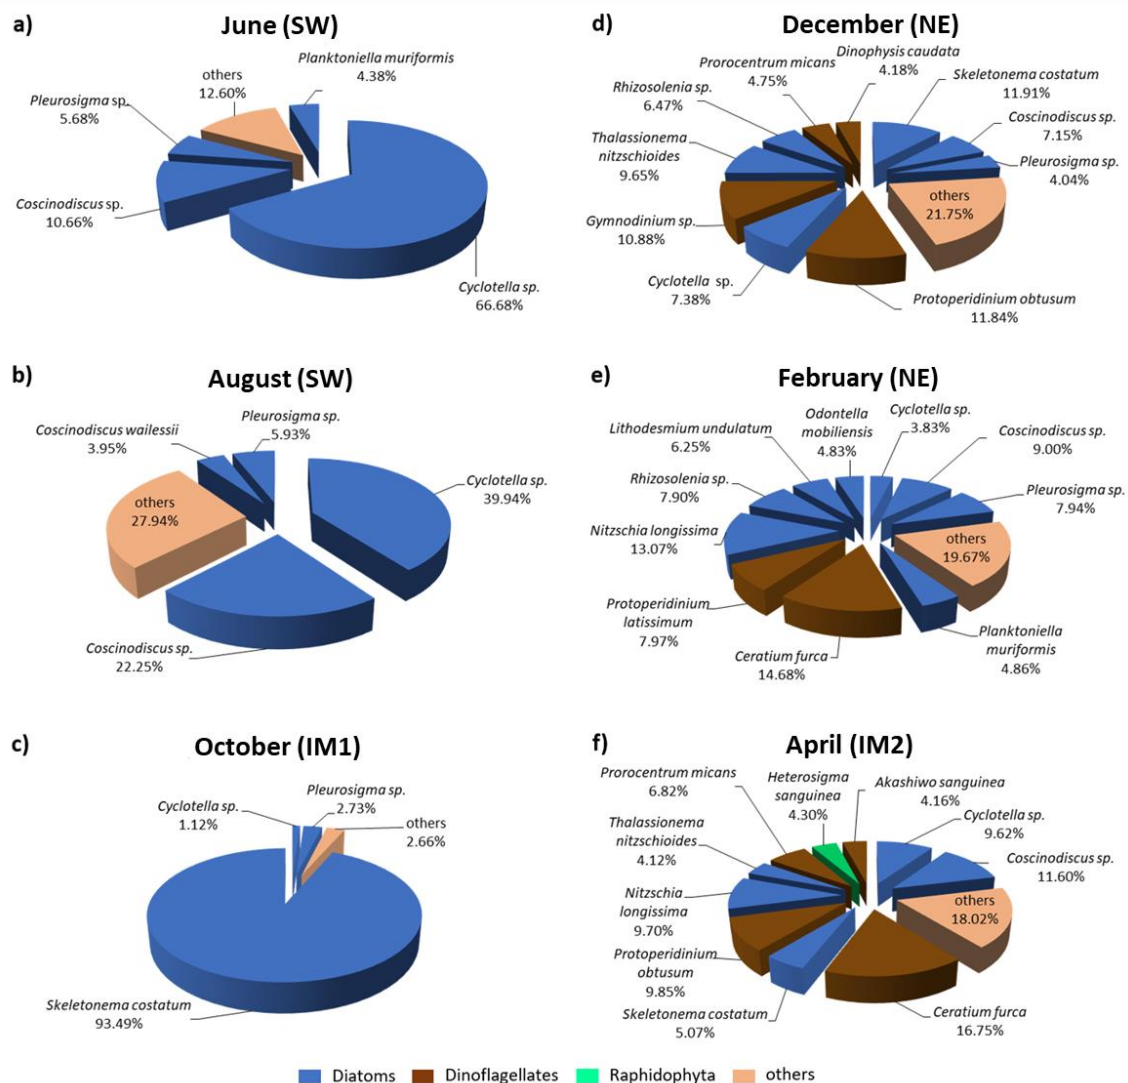

**Figure S1.** Seasonal contributions of different major phytoplankton species (mean %) in the Sangga Kecil estuarine-mangrove area during dry season of southwest monsoon: (a) June and (b) August, during wet season of northeast monsoon: (d) November and (e) February, and during the transitional periods of post-southwest and post-northeast monsoon seasons: (c) October and (f) April respectively. SW: southwest monsoon, IM1: intermonsoon (dry to wet seasons), NE: northeast monsoon and IM2: intermonsoon (wet to dry seasons).

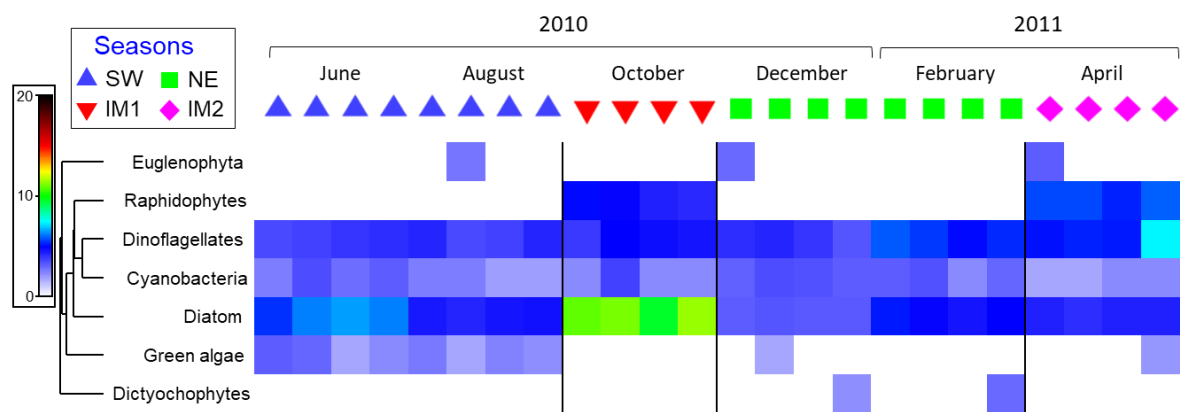

**Figure S2.** Shade plot of phytoplankton group across different monsoonal seasons with scale intensity proportional to the fourth-root abundance. The dendrogram shows the group clustering using standard agglomerative methods of calculating group average, based on the index of association matrix. SW: southwest monsoon, IM1: intermonsoon (dry to wet seasons), NE: northeast monsoon and IM2: intermonsoon (wet to dry seasons).
